# Supplementary material for: Hospitalization and Critical Care of 109 Decedents with COVID-19 Pneumonia in Wuhan, China
Source: PubMed Central journal article supplement — Ann Am Thorac Soc. 2020 Jul;17(7):839–46. doi: 10.1513/AnnalsATS.202003-225OC (PMC7328178; doi:10.1513/annalsats.202003-225oc), 2020-07
Supplement: AnnalsATS.202003-225OC_du_data_supplement.pdf [file AnnalsATS.202003-225OC_du_data_supplement.pdf]

## **Online Data Supplement**

### **Hospitalization and Critical Care of 109 Decedents with COVID-19 Pneumonia in Wuhan, China**

Rong-Hui Du, Li-Min Liu, Wen Yin, Wen Wang, Lu-Lu Guan, Ming-Li Yuan, Yu-Lei Li, Yi Hu, Xu-Yan Li, Bing Sun, Peng Peng, Huan-Zhong Shi

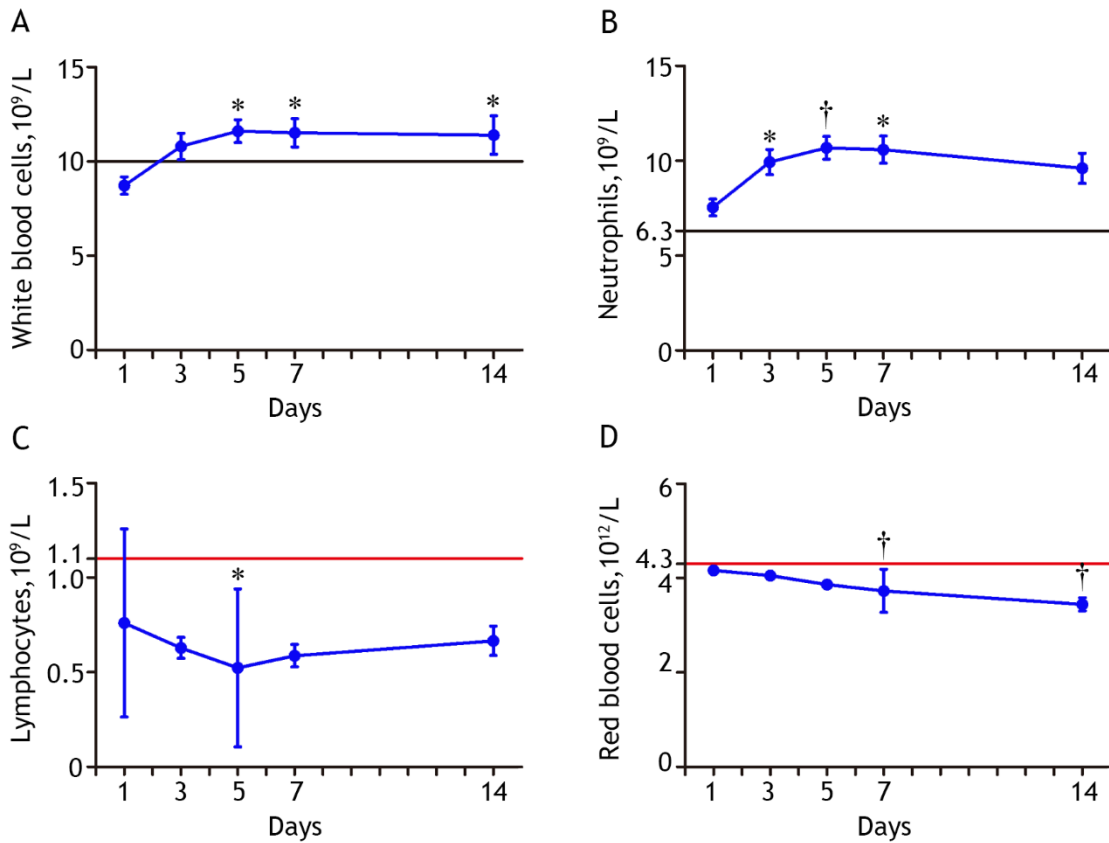

**Figure E1.** Dynamic Profile of Blood Cell Counts in Deceased Patients with COVID-19 Pneumonia. The changes in numbers of white blood cells (A), neutrophils (B), lymphocytes (C), and red blood cells (D) on the day 1 (n=109), 3 (n=76), 5 (n=72), 7 (n=72), and 14 (n=46) after hospitalization are presented. The lines in black show the upper normal limit of each parameter, and the lines in red show the lower normal limit. \* $P < 0.05$ , †  $P < 0.01$  compared with day 1 determined by Student's t test (A, B and D) or Mann-Whitney U test (C).

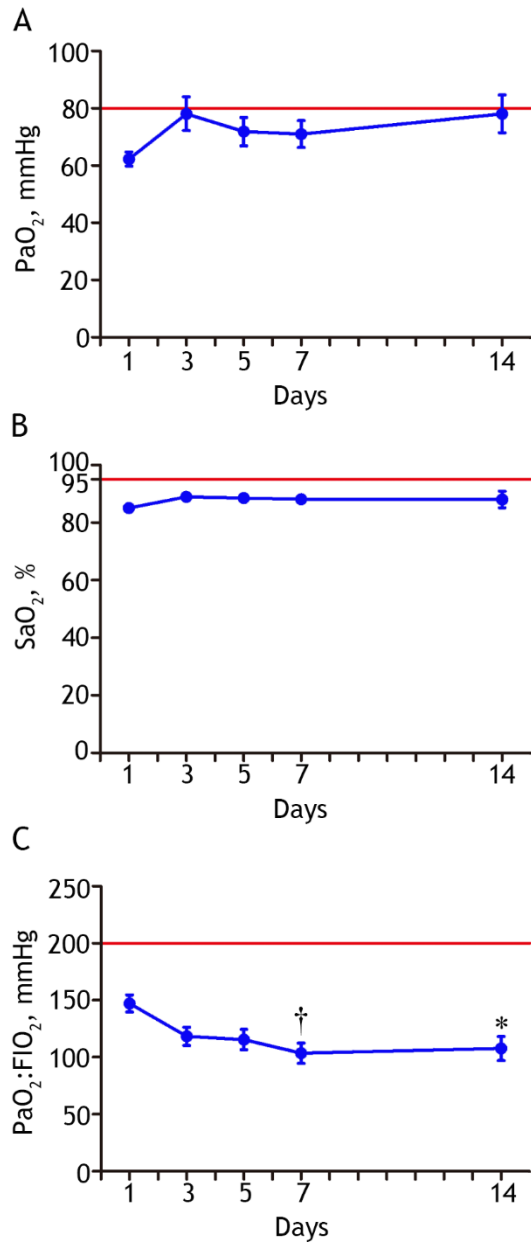

**Figure E2.** Dynamic Profile of Arterial Partial Pressure of Oxygen (PaO<sub>2</sub>), Arterial Oxygen Saturation (SaO<sub>2</sub>), and Fraction of Inspired Oxygen (PaO<sub>2</sub>:F<sub>I</sub>O<sub>2</sub>) in Deceased Patients with COVID-19 Pneumonia. The changes in PaO<sub>2</sub> (A), SaO<sub>2</sub> (B), and PaO<sub>2</sub>:F<sub>I</sub>O<sub>2</sub> (C) on the day 1 (n=109), 3 (n=62), 5 (n=57), 7 (n=52), and 14 (n=32) after hospitalization are presented. The lines in red show the lower normal limit of each parameter. \**P* < 0.05, † *P* < 0.01 compared with day 1 determined by Student's *t* test (A) or Mann-Whitney U test (B and C).

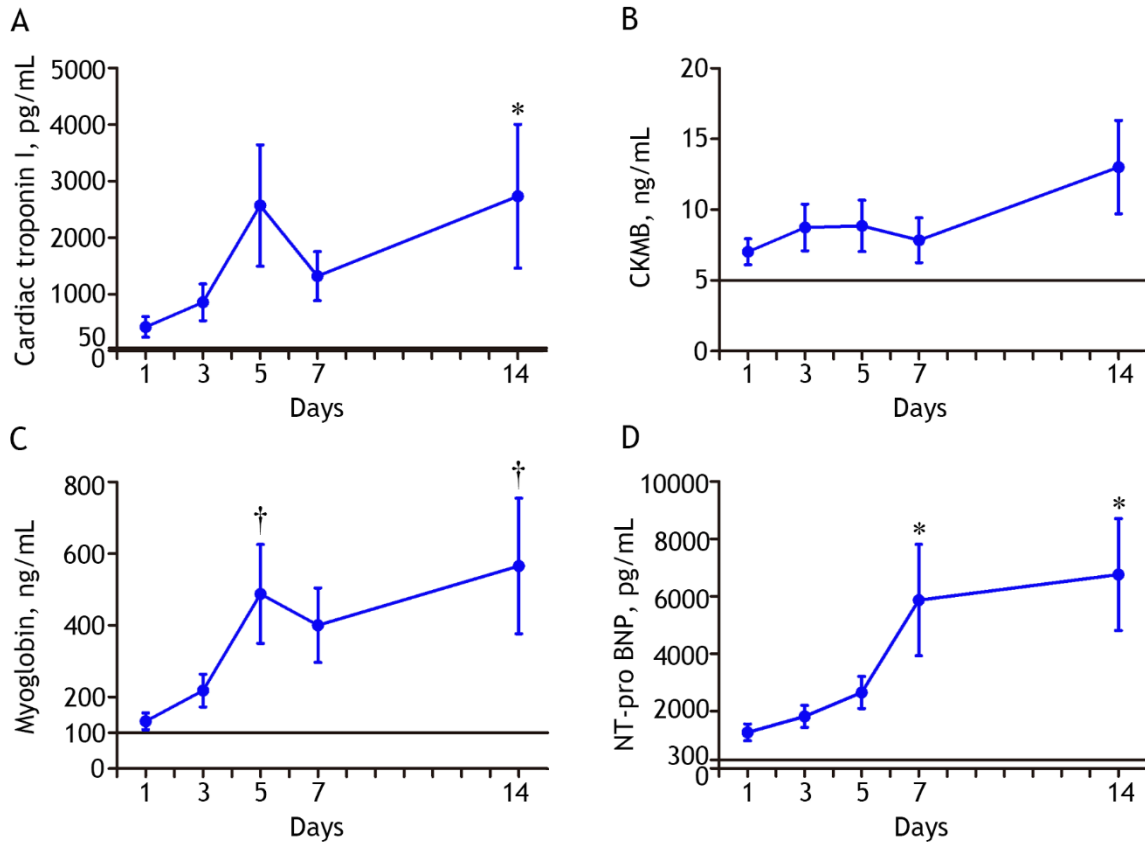

**Figure E3.** Dynamic Profile of Heart Function in Deceased Patients with COVID-19 Pneumonia. The changes in concentrations of cardiac troponin I (A), creatine kinase MB (CKMB) (B), myoglobin (C), and NT-pro-brain natriuretic peptide (BNP) on the day 1 (n=109), 3 (n=57), 5 (n=53), 7 (n=54), and 14 (n=43) after hospitalization are presented. The lines in black show the upper normal limit of each parameter. \* $P < 0.05$ , †  $P < 0.01$  compared with day 1 determined by Mann-Whitney U test.

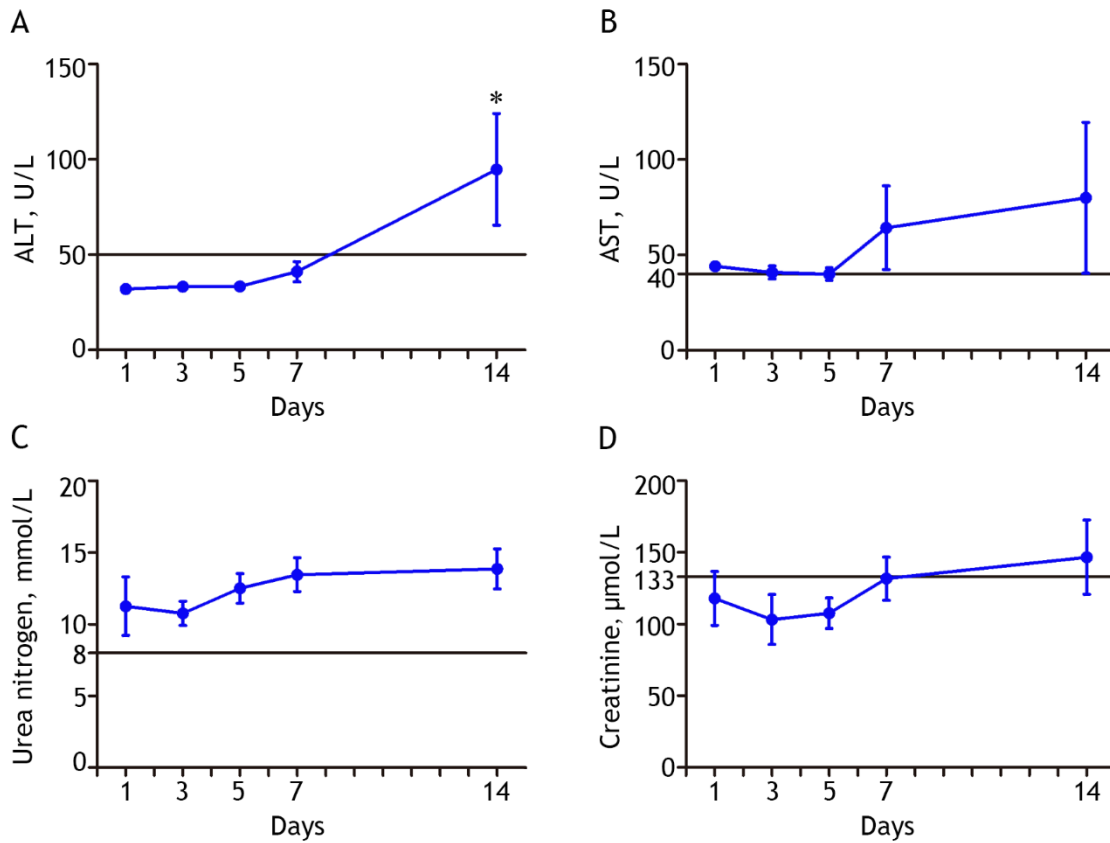

**Figure E4.** Dynamic Profile of Hepatic and Renal Function in Deceased Patients with COVID-19 Pneumonia. The changes in concentrations of alanine aminotransferase (A), aspartate aminotransferase (B), urea nitrogen (C), and creatinine on the day 1 (n=109), 3 (n=65), 5 (n=60), 7 (n=68), and 14 (n=38) after hospitalization are presented. The lines in black show the upper normal limit of each parameter. \*  $P < 0.01$  compared with day 1 determined by Mann-Whitney U test.

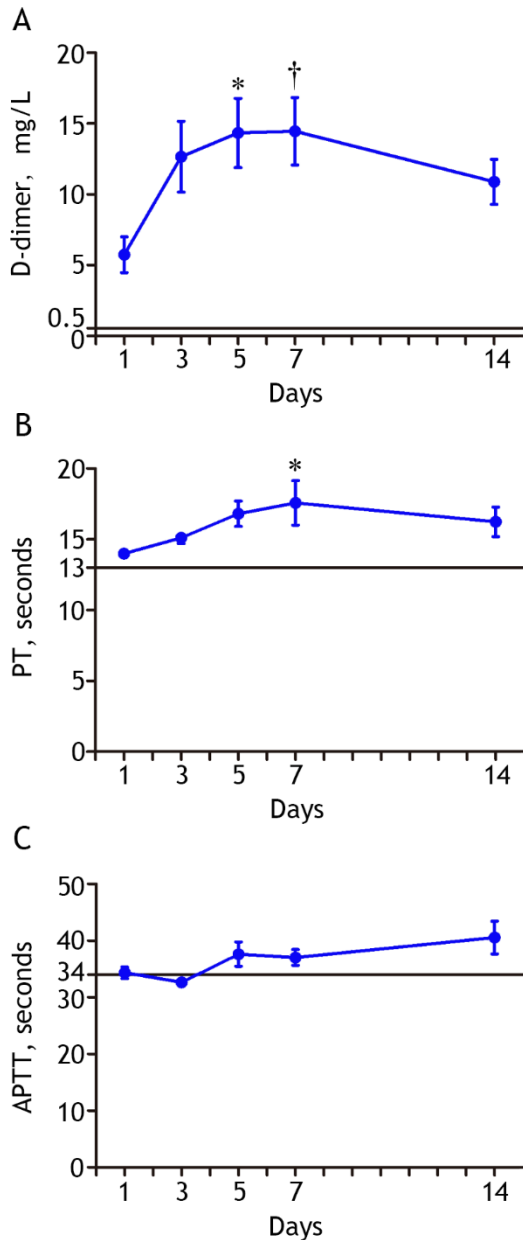

**Figure E5.** Dynamic Profile of Coagulation Function in Deceased Patients with COVID-19 Pneumonia. The changes in concentrations of D-dimer (A), prothrombin time (B), and activated partial thromboplastin time (C) on the day 1 (n=109), 3 (n=61), 5 (n=54), 7 (n=57), and 14 (n=34) after hospitalization are presented. The lines in black show the upper normal limit of each parameter. \* $P < 0.05$ , †  $P < 0.01$  compared with day 1 determined by Mann-Whitney U test (figure A and B) or Student's t test (figure C).
